# Supplementary material
Source: PubMed Central journal article supplement (PMC3800006)
Supplement: NIHMS509771-supplement-Table_2.pdf [file NIHMS509771-supplement-Table_2.pdf]

Table 2. Access to EGFR mutation analysis summarized by state

| State                  | Hospitals analyzed | NCI cancer centers | Hospital cytogenetic labs | Hospitals ordered EGFR | Assays (n=6074) | Guideline directed LC cases <sup>1</sup> | % cases tested by EGFR assay <sup>2</sup> |
|------------------------|--------------------|--------------------|---------------------------|------------------------|-----------------|------------------------------------------|-------------------------------------------|
| Alabama                | 99                 | 1                  | 2                         | 5                      | 35              | 2,719                                    | 1.29                                      |
| Alaska                 | 15                 | 0                  | 0                         | 0                      | 0               | 233                                      | .00                                       |
| Arizona                | 79                 | 1                  | 1                         | 13                     | 135             | 2,557                                    | 5.28                                      |
| Arkansas               | 75                 | 0                  | 2                         | 1                      | 6               | 1,666                                    | .36                                       |
| California             | 345                | 10                 | 10                        | 51                     | 330             | 11,884                                   | 2.78                                      |
| Colorado               | 74                 | 1                  | 3                         | 9                      | 106             | 1,516                                    | 6.99                                      |
| Connecticut            | 33                 | 1                  | 5                         | 19                     | 228             | 1,770                                    | 12.88                                     |
| Delaware               | 5                  | 0                  | 1                         | 3                      | 78              | 490                                      | 15.91                                     |
| DC                     | 7                  | 1                  | 2                         | 1                      | 13              | 228                                      | 5.69                                      |
| Florida                | 186                | 1                  | 6                         | 42                     | 401             | 10,910                                   | 3.68                                      |
| Georgia                | 144                | 1                  | 2                         | 19                     | 129             | 4,176                                    | 3.09                                      |
| Hawaii                 | 23                 | 1                  | 1                         | 2                      | 17              | 517                                      | 3.29                                      |
| Idaho                  | 41                 | 0                  | 1                         | 2                      | 6               | 528                                      | 1.14                                      |
| Illinois               | 186                | 2                  | 15                        | 33                     | 254             | 6,349                                    | 4.00                                      |
| Indiana                | 108                | 2                  | 3                         | 12                     | 110             | 3,476                                    | 3.16                                      |
| Iowa                   | 117                | 1                  | 2                         | 5                      | 31              | 1,635                                    | 1.90                                      |
| Kansas                 | 135                | 0                  | 1                         | 6                      | 49              | 1,340                                    | 3.66                                      |
| Kentucky               | 98                 | 0                  | 1                         | 11                     | 141             | 3,149                                    | 4.48                                      |
| Louisiana              | 131                | 0                  | 3                         | 3                      | 27              | *                                        | *                                         |
| Maine                  | 34                 | 1                  | 0                         | 3                      | 32              | 898                                      | 3.57                                      |
| Maryland               | 47                 | 2                  | 6                         | 10                     | 280             | 2,320                                    | 12.07                                     |
| Massachusetts          | 70                 | 2                  | 10                        | 25                     | 333             | 3,326                                    | 10.01                                     |
| Michigan               | 139                | 2                  | 9                         | 12                     | 220             | 5,067                                    | 4.34                                      |
| Minnesota              | 133                | 2                  | 6                         | 8                      | 59              | 2,126                                    | 2.77                                      |
| Mississippi            | 93                 | 1                  | 1                         | 5                      | 21              | 1,663                                    | 1.26                                      |
| Missouri               | 113                | 1                  | 2                         | 9                      | 186             | 3,482                                    | 5.34                                      |
| Montana                | 60                 | 0                  | 1                         | 1                      | 4               | 478                                      | .84                                       |
| Nebraska               | 86                 | 1                  | 1                         | 2                      | 23              | 749                                      | 3.07                                      |
| Nevada                 | 33                 | 0                  | 2                         | 5                      | 58              | 1,144                                    | 5.07                                      |
| New Hampshire          | 25                 | 1                  | 1                         | 5                      | 22              | 677                                      | 3.25                                      |
| New Jersey             | 72                 | 1                  | 12                        | 26                     | 225             | 3,957                                    | 5.69                                      |
| New Mexico             | 42                 | 1                  | 0                         | 1                      | 3               | 641                                      | .47                                       |
| New York               | 203                | 6                  | 14                        | 65                     | 970             | 9,217                                    | 10.52                                     |
| North Carolina         | 117                | 3                  | 8                         | 15                     | 222             | 4,975                                    | 4.46                                      |
| North Dakota           | 45                 | 0                  | 0                         | 3                      | 49              | 278                                      | 17.62                                     |
| Ohio                   | 161                | 1                  | 13                        | 27                     | 202             | 6,212                                    | 3.25                                      |
| Oklahoma               | 125                | 0                  | 3                         | 5                      | 17              | 2,028                                    | .84                                       |
| Oregon                 | 57                 | 1                  | 4                         | 9                      | 47              | 1,778                                    | 2.64                                      |
| Pennsylvania           | 169                | 5                  | 15                        | 32                     | 298             | 7,207                                    | 4.14                                      |
| Rhode Island           | 11                 | 0                  | 2                         | 3                      | 20              | 597                                      | 3.35                                      |
| South Carolina         | 56                 | 1                  | 2                         | 7                      | 29              | 2,349                                    | 1.23                                      |
| South Dakota           | 62                 | 0                  | 0                         | 1                      | 1               | 326                                      | .31                                       |
| Tennessee              | 119                | 2                  | 3                         | 8                      | 74              | 3,772                                    | 1.96                                      |
| Texas                  | 381                | 4                  | 9                         | 30                     | 204             | 8,609                                    | 2.37                                      |
| Utah                   | 41                 | 1                  | 1                         | 3                      | 4               | 405                                      | .99                                       |
| Vermont                | 12                 | 0                  | 1                         | 1                      | 1               | 351                                      | .28                                       |
| Virginia               | 85                 | 2                  | 6                         | 11                     | 95              | 3,569                                    | 2.66                                      |
| Washington             | 88                 | 1                  | 4                         | 5                      | 22              | 2,883                                    | .76                                       |
| West Virginia          | 54                 | 0                  | 3                         | 4                      | 65              | 1,306                                    | 4.98                                      |
| Wisconsin <sup>3</sup> | 122                | 1                  | 2                         | 14                     | 190             | 1,400                                    | 13.57                                     |
| Wyoming                | 25                 | 0                  | 0                         | 1                      | 2               | 207                                      | .97                                       |
| Total                  | 4781               | 66                 | 202                       | 593                    | 6074            | 138,189                                  | 4.40%                                     |

\*Not available due to hurricane Katrina. 1. Source: State cancer profiles web site which reports National Program of Cancer Registries Cancer Surveillance System (NPCR-CSS) 2009 data. 2. Calculated as assays ordered from Genzyme divided by guideline directed annual lung cancer cases. Excludes orders from NCI cancer centers and EGFR mutation analysis by LDTs. 3. Data for 2008 obtained from state web site.
